# Supplementary material for: Outlier-Sensitive Flood Frequency Modelling of the Jhelum River Using Multi-Distribution and Multi-Estimator Analysis
Source: Research Square preprint supplement (doi:10.21203/rs.3.rs-8616109/v1), 2026-01-19
Supplement: Supplementary file 1 [file cc8d1832b71cbb56ef75a733.docx]

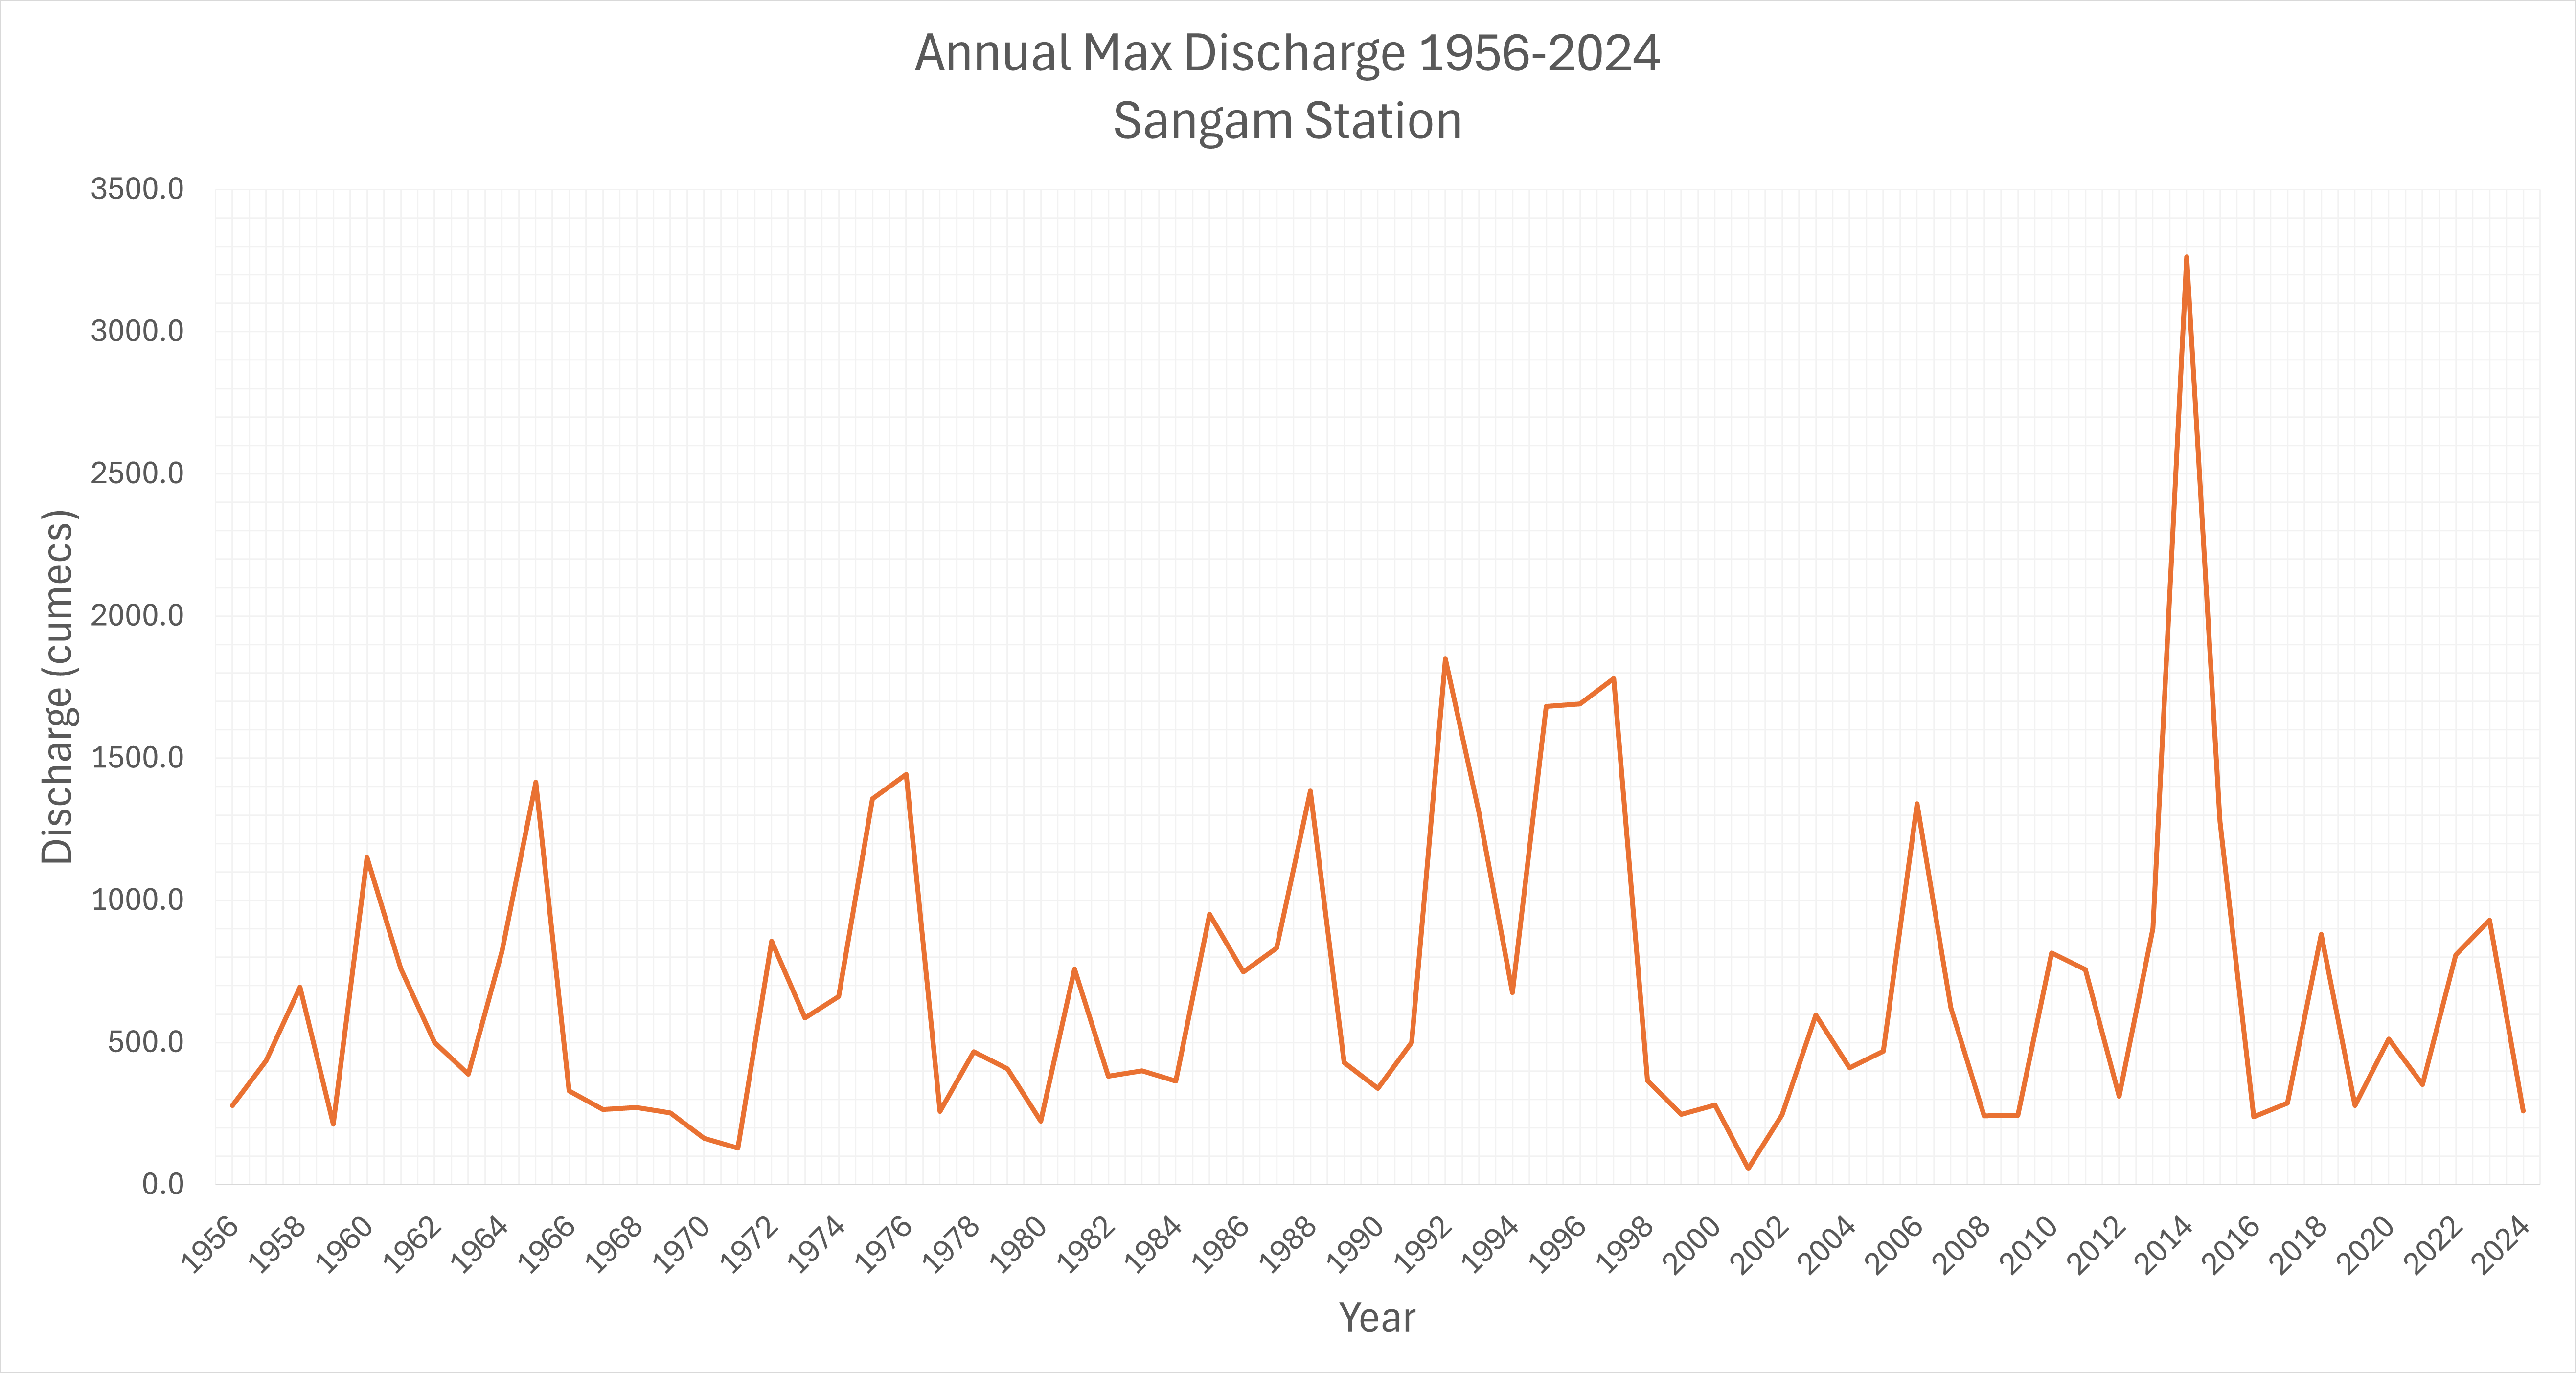


**Figure 1: AMD Plot of Sangam Station**


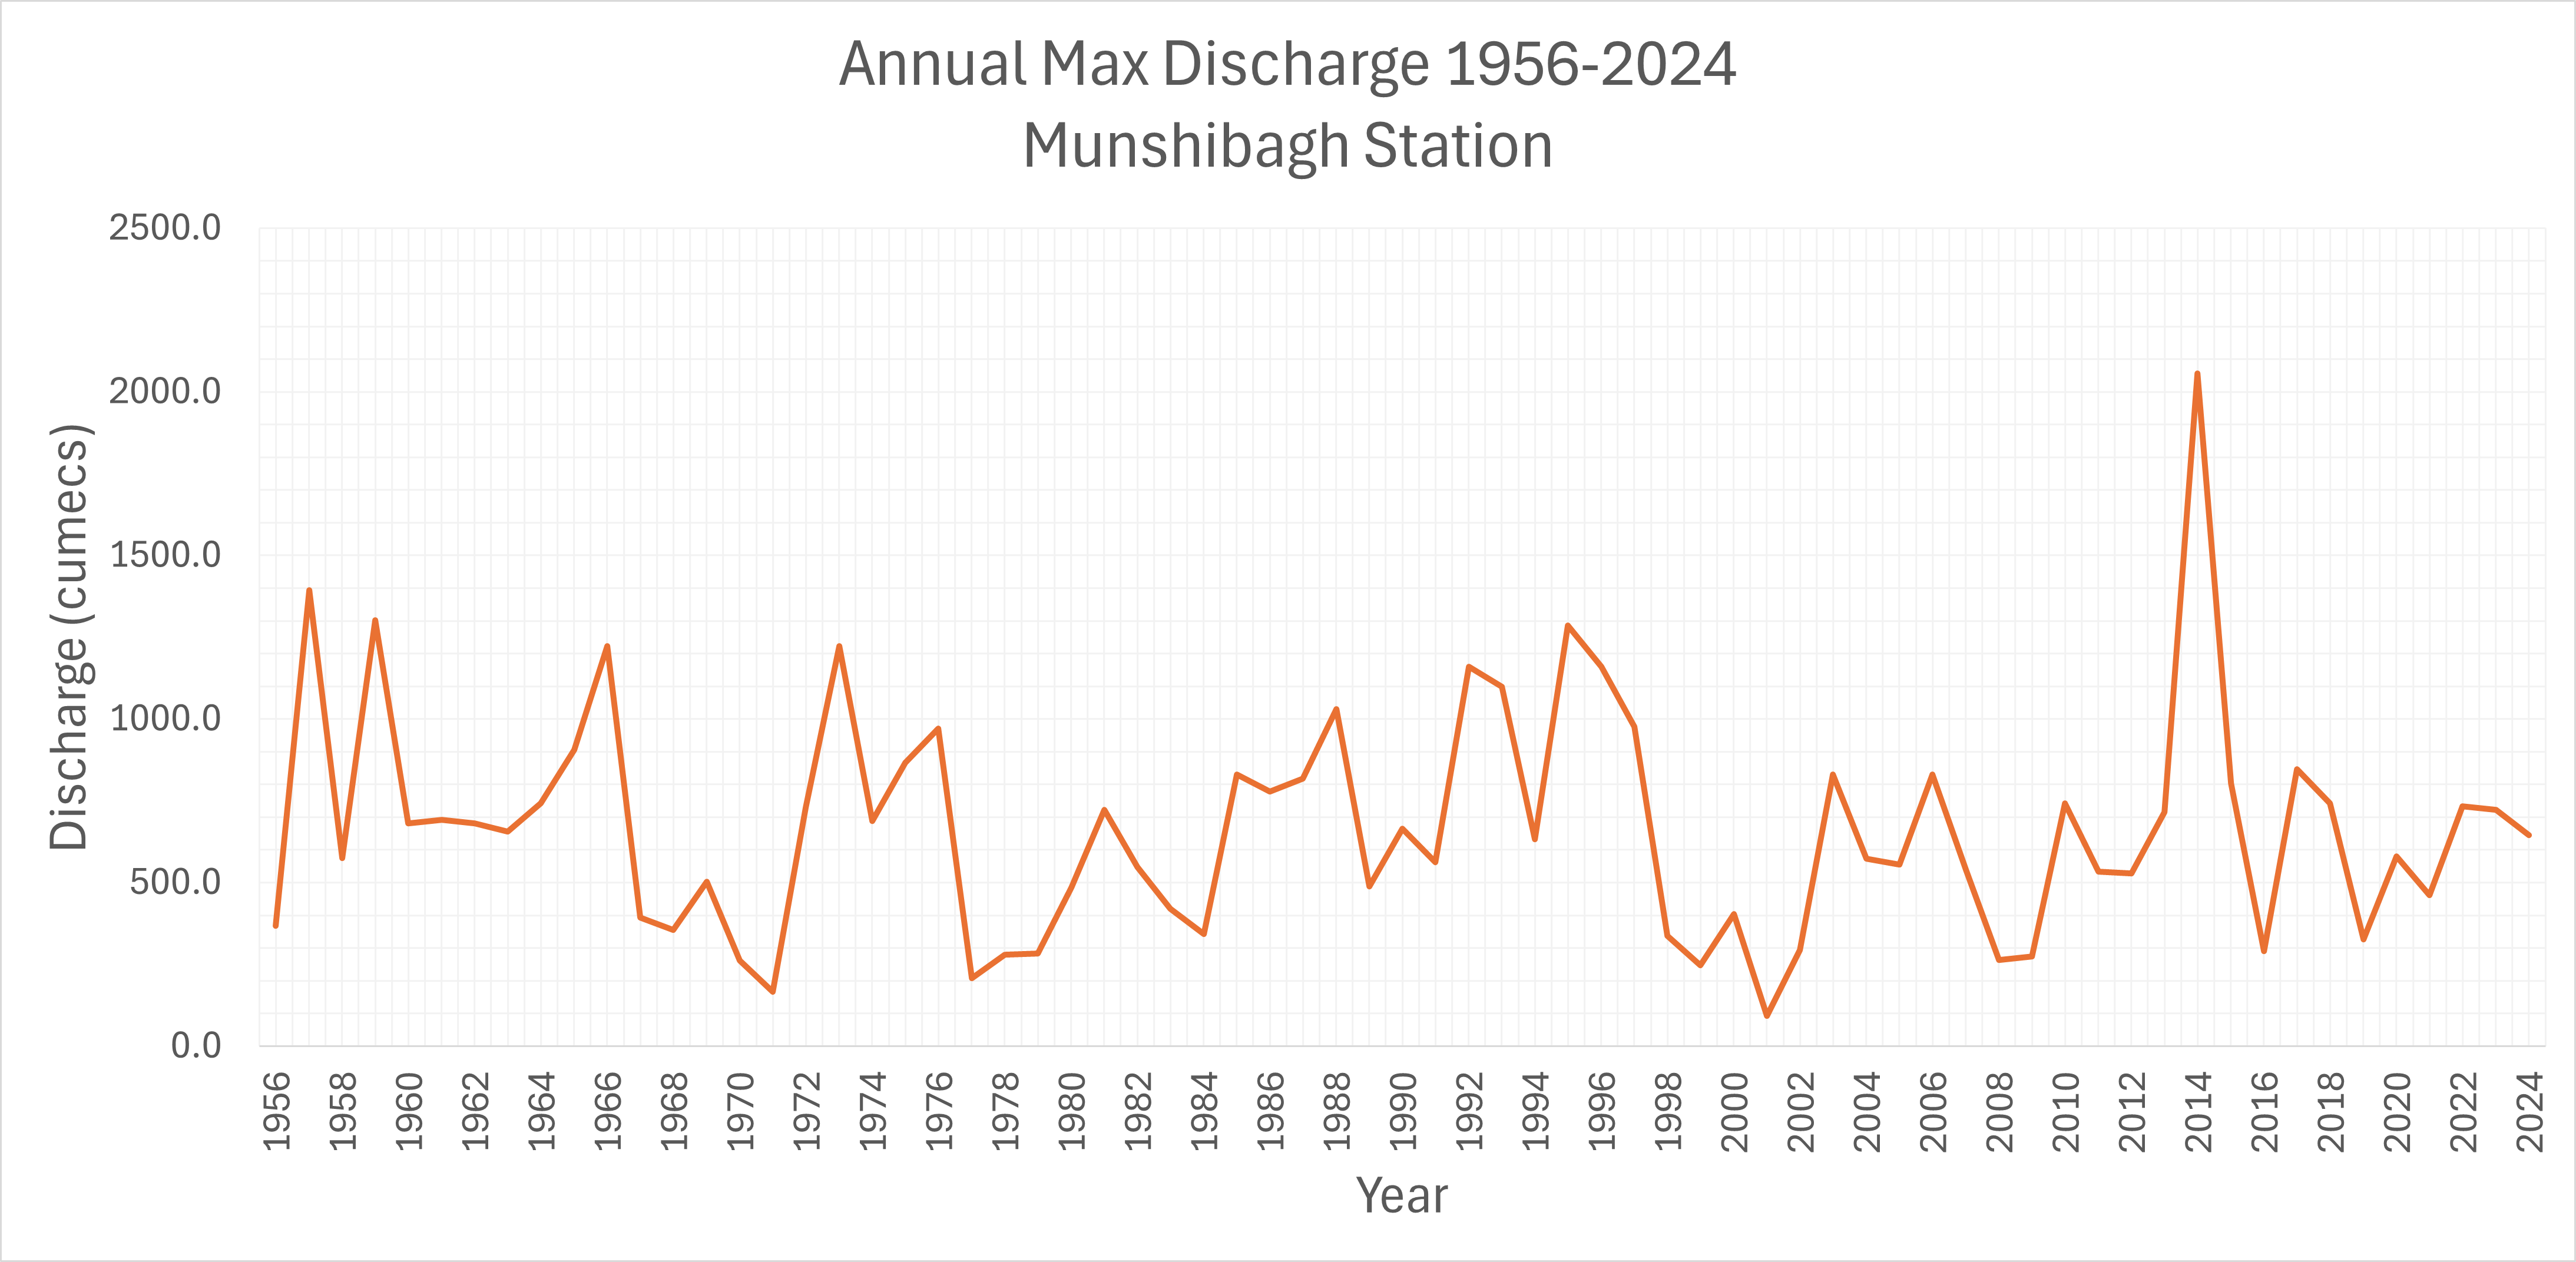


**Figure 2: AMD plot of Munshibagh Station.**


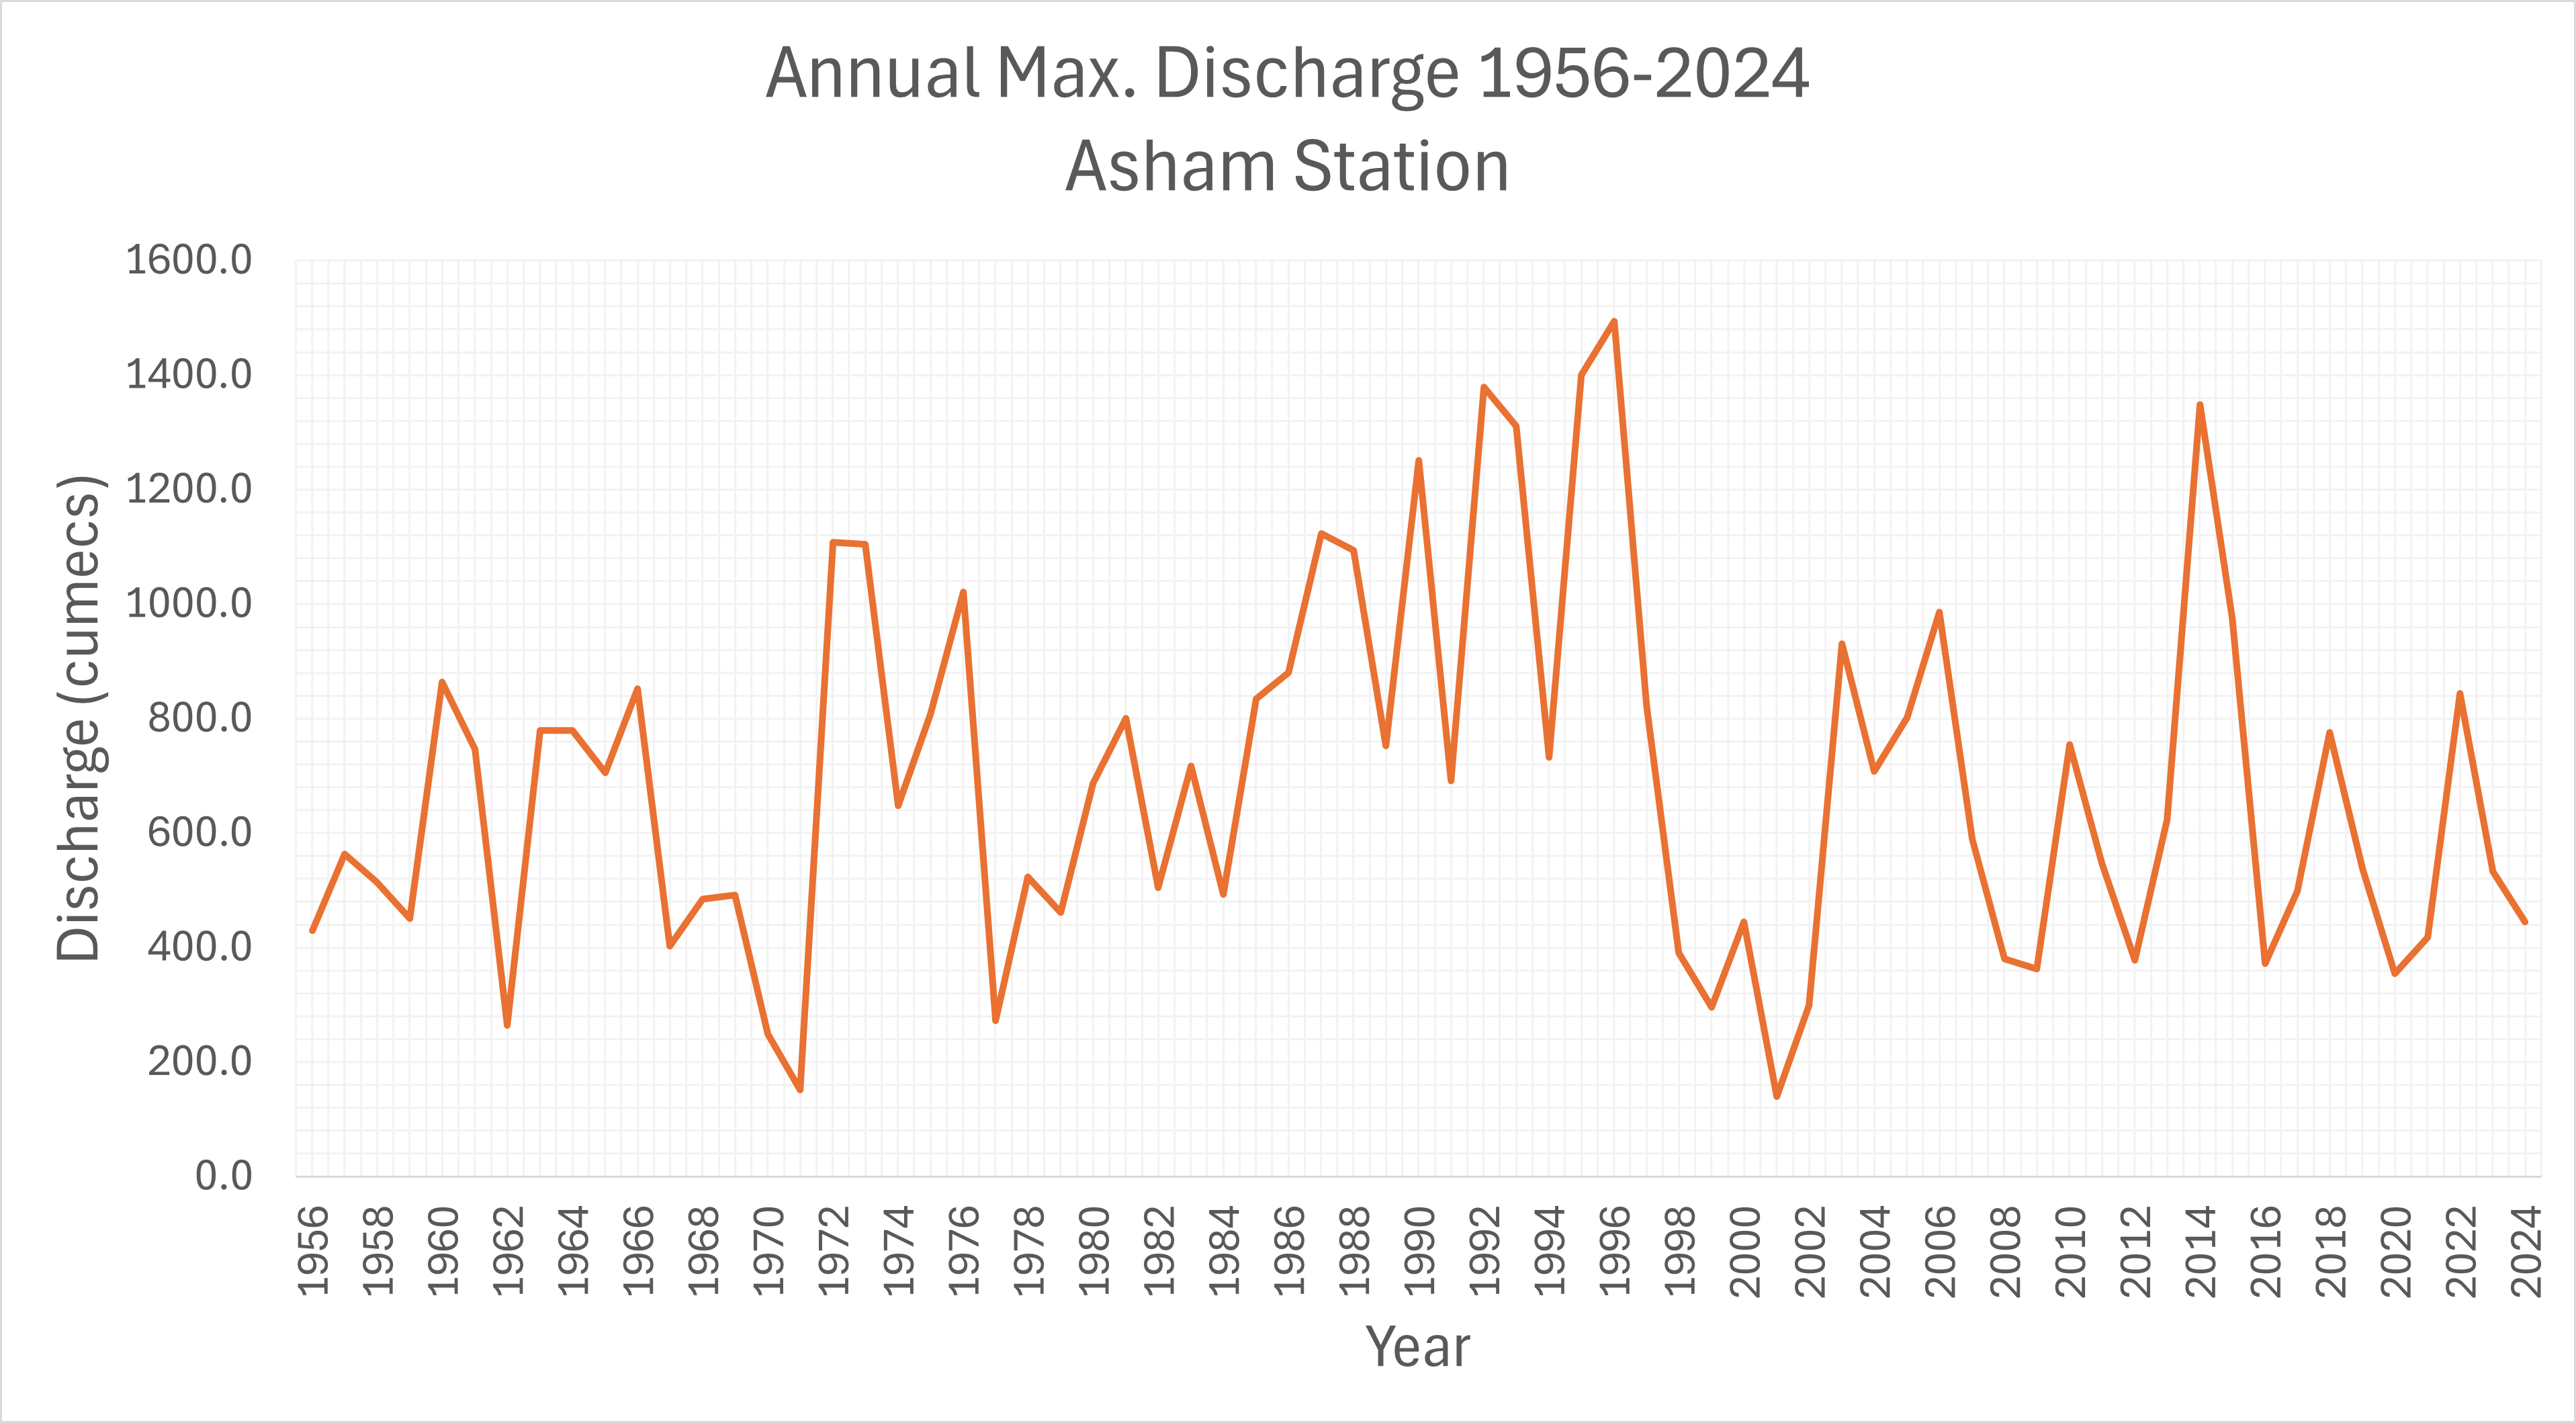


**Figure 3: AMD plot for Asham Station**

**Table S1: Descriptive statistics of Sangam station**

| **Raw Data** | | | | |  | **Treated Data** | | | | |
| --- | --- | --- | --- | --- | --- | --- | --- | --- | --- | --- |
| **Statistic** | **Value** |  | **Percentile** | **Value** | **Statistic** | **Value** |  | **Percentile** | **Value** |
| **Sample Size** | 69 | **Min** | 57.5 | **Sample Size** | 69 | **Min** | 128.1 |
| **Range** | 3205.2 | **5%** | 188.35 | **Range** | 3134.6 | **5%** | 218.75 |
| **Mean** | 686.96 | **10%** | 241.8 | **Mean** | 689.92 | **10%** | 243.8 |
| **Variance** | 299510 | **25% (Q1)** | 279.1 | **Variance** | 296330 | **25% (Q1)** | 279.1 |
| **Std. Deviation** | 547.28 | **50% (Median)** | 500.1 | **Std. Deviation** | 544.37 | **50% (Median)** | 500.1 |
| **Coef. of Variation** | 0.79667 | **75% (Q3)** | 868.6 | **Coef. of Variation** | 0.78902 | **75% (Q3)** | 868.6 |
| **Std. Error** | 65.885 | **90%** | 1415.9 | **Std. Error** | 65.534 | **90%** | 1415.9 |
| **Skewness** | 2.0331 | **95%** | 1735.5 | **Skewness** | 2.0653 | **95%** | 1735.5 |
| **Excess Kurtosis** | 6.1475 | **Max** | 3262.7 | **Excess Kurtosis** | 6.2772 | **Max** | 3262.7 |

**Table S2 Descriptive Statistics of Munshibagh station.**

| **Raw Data** | | | | |  | **Treated Data** | | | | |
| --- | --- | --- | --- | --- | --- | --- | --- | --- | --- | --- |
|  |  |  |  |  |  |  |  |  |  |  |
| **Statistic** | **Value** |  | **Percentile** | **Value** |  | **Statistic** | **Value** |  | **Percentile** | **Value** |
| **Sample Size** | 69 | **Min** | 92.6 |  | **Sample Size** | 69 | **Min** | 166.8 |
| **Range** | 1962.8 | **5%** | 227.4 |  | **Range** | 1888.6 | **5%** | 254.25 |
| **Mean** | 668.28 | **10%** | 274.3 |  | **Mean** | 671.94 | **10%** | 279.9 |
| **Variance** | 119840.00 | **25% (Q1)** | 398.25 |  | **Variance** | 116490.00 | **25% (Q1)** | 398.25 |
| **Std. Deviation** | 346.18 | **50% (Median)** | 655.1 |  | **Std. Deviation** | 341.31 | **50% (Median)** | 655.1 |
| **Coef. of Variation** | 0.51801 | **75% (Q3)** | 829.65 |  | **Coef. of Variation** | 0.50794 | **75% (Q3)** | 829.65 |
| **Std. Error** | 41.675 | **90%** | 1158.9 |  | **Std. Error** | 41.088 | **90%** | 1158.9 |
| **Skewness** | 1.1614 | **95%** | 1293.8 |  | **Skewness** | 1.2386 | **95%** | 1293.8 |
| **Excess Kurtosis** | 2.6299 | **Max** | 2055.4 |  | **Excess Kurtosis** | 2.7923 | **Max** | 2055.4 |

**Table S3 Descriptive Statistics of Asham station**.

| **Raw Data** | | | | |  | **Treated Data** | | | | |
| --- | --- | --- | --- | --- | --- | --- | --- | --- | --- | --- |
|  |  |  |  |  |  |  |  |  |  |  |
| **Statistic** | **Value** |  | **Percentile** | **Value** |  | **Statistic** | **Value** |  | **Percentile** | **Value** |
| **Sample Size** | 69 | **Min** | 139.1 |  | **Sample Size** | 69 | **Min** | 248.6 |
| **Range** | 1354.6 | **5%** | 256.4 |  | **Range** | 1245.1 | **5%** | 283.85 |
| **Mean** | 686.5 | **10%** | 299.5 |  | **Mean** | 695.19 | **10%** | 362.9 |
| **Variance** | 101190 | **25% (Q1)** | 445 |  | **Variance** | 94397 | **25% (Q1)** | 447.7 |
| **Std. Deviation** | 318.1 | **50% (Median)** | 686.3 |  | **Std. Deviation** | 307.24 | **50% (Median)** | 686.3 |
| **Coef. of Variation** | 0.46337 | **75% (Q3)** | 847.7 |  | **Coef. of Variation** | 0.44195 | **75% (Q3)** | 847.7 |
| **Std. Error** | 38.295 | **90%** | 1122.8 |  | **Std. Error** | 36.988 | **90%** | 1122.8 |
| **Skewness** | 0.6342 | **95%** | 1363.3 |  | **Skewness** | 0.76267 | **95%** | 1363.3 |
| **Excess Kurtosis** | -0.10526 | **Max** | 1493.7 |  | **Excess Kurtosis** | -0.03937 | **Max** | 1493.7 |

**Table** **S4 Quantile results Sangam station before and after outlier**.

| **Before Treating the Outliers** | | | | | | | | | | | | |
| --- | --- | --- | --- | --- | --- | --- | --- | --- | --- | --- | --- | --- |
| **Return**  **Period** | **GUMBEL** | | | **GEV** | | | **GAMMA** | | | **LOG PEARSON 3** | | |
| **MLE** | **MOM** | **LMOM** | **MLE** | **MOM** | **LMOM** | **MLE** | **MOM** | **LMOM** | **MLE** | **MOM** | **LMOM** |
| **2** | **590** | 597 | 605 | **504** | 390 | 533 | **579** | 548 | 570 | **515** | 529 | 515 |
| **5** | 975 | 1081 | 1047 | 939 | 1572 | 958 | 1026 | 1057 | 1035 | 959 | 985 | 979 |
| **10** | 1230 | 1401 | 1340 | 1363 | 2431 | 1314 | 1329 | 1414 | 1354 | 1352 | 1357 | 1387 |
| **25** | 1552 | 1805 | 1710 | 2128 | 3613 | 1871 | 1708 | 1870 | 1755 | 1977 | 1906 | 2032 |
| **50** | 1791 | 2106 | 1985 | 2926 | 4566 | 2378 | 1985 | 2207 | 2050 | 2546 | 2371 | 2615 |
| **100** | 2028 | 2404 | 2258 | 3985 | 5580 | 2979 | 2256 | 2539 | 2338 | 3213 | 2881 | 3293 |
| **150** | 2167 | 2577 | 2416 | 4761 | 6204 | 3381 | 2413 | 2732 | 2505 | 3655 | 3203 | 3739 |
| **200** | 2265 | 2700 | 2529 | 5396 | 6663 | 3692 | 2523 | 2868 | 2623 | 3993 | 3441 | 4079 |
| **250** | 2341 | 2796 | 2616 | 5943 | 7027 | 3948 | 2608 | 2973 | 2714 | 4271 | 3633 | 4357 |
| **300** | 2403 | 2874 | 2688 | 6429 | 7331 | 4169 | 2678 | 3059 | 2788 | 4508 | 3794 | 4594 |
| **400** | 2501 | 2997 | 2800 | 7276 | 7822 | 4539 | 2787 | 3194 | 2904 | 4902 | 4055 | 4987 |
| **500** | 2577 | 3092 | 2887 | 8005 | 8212 | 4844 | 2871 | 3298 | 2994 | 5225 | 4264 | 5308 |
| **After Treating the Outliers** | | | | | | | | | | | | |
| **Return Period** | **GUMBEL** | | | **GEV** | | | **GAMMA** | | | **LOG PEARSON 3** | | |
| **MLE** | **MOM** | **LMOM** | **MLE** | **MOM** | **LMOM** | **MLE** | **MOM** | **LMOM** | **MLE** | **MOM** | **LMOM** |
| **2** | 593 | 600 | 608 | 492 | 394 | 533 | 587 | 553 | 575 | 502 | 519 | 508 |
| **5** | 967 | 1082 | 1046 | 930 | 1570 | 950 | 1024 | 1059 | 1037 | 943 | 955 | 958 |
| **10** | 1215 | 1400 | 1336 | 1392 | 2425 | 1305 | 1318 | 1414 | 1353 | 1366 | 1341 | 1381 |
| **25** | 1528 | 1802 | 1703 | 2291 | 3601 | 1868 | 1685 | 1865 | 1750 | 2094 | 1958 | 2096 |
| **50** | 1760 | 2101 | 1975 | 3297 | 4548 | 2389 | 1953 | 2199 | 2041 | 2811 | 2523 | 2785 |
| **100** | 1991 | 2397 | 2245 | 4718 | 5557 | 3013 | 2214 | 2527 | 2326 | 3710 | 3189 | 3634 |
| **150** | 2125 | 2570 | 2402 | 5809 | 6178 | 3434 | 2365 | 2718 | 2491 | 4335 | 3631 | 4217 |
| **200** | 2220 | 2693 | 2513 | 6730 | 6634 | 3762 | 2471 | 2852 | 2607 | 4831 | 3971 | 4675 |
| **250** | 2294 | 2788 | 2600 | 7541 | 6997 | 4034 | 2553 | 2956 | 2696 | 5247 | 4250 | 5057 |
| **300** | 2355 | 2865 | 2670 | 8275 | 7299 | 4268 | 2620 | 3041 | 2769 | 5610 | 4489 | 5388 |
| **400** | 2450 | 2987 | 2782 | 9578 | 7787 | 4662 | 2725 | 3175 | 2884 | 6226 | 4888 | 5947 |
| **500** | 2524 | 3082 | 2868 | 10728 | 8175 | 4990 | 2806 | 3278 | 2973 | 6744 | 5215 | 6413 |

**Table S5: Sangam quantile changes for Gumbel distribution**

| **Return Period** | **GUMBEL (Sangam)** | | | | | | | | | | | | | |
| --- | --- | --- | --- | --- | --- | --- | --- | --- | --- | --- | --- | --- | --- | --- |
| **MLE (BO)** | **MLE (AO)** | **Differ-ence** | **Perce-ntage** |  | **MOM (BO)** | **MOM (AO)** | **Differ-ence** | **Perce-ntage** |  | **LMOM (BO)** | **LMOM (AO)** | **Differ-ence** | **Perce-ntage** |
| **2** | 590 | 593 | 3 | 0.508 |  | 597 | 600 | 3 | 0.503 |  | 605 | 608 | 3 | 0.496 |
| **5** | 975 | 967 | -8 | -0.821 |  | 1081 | 1082 | 1 | 0.093 |  | 1047 | 1046 | -1 | -0.096 |
| **10** | 1230 | 1215 | -15 | -1.220 |  | 1401 | 1400 | -1 | -0.071 |  | 1340 | 1336 | -4 | -0.299 |
| **25** | 1552 | 1528 | -24 | -1.546 |  | 1805 | 1802 | -3 | -0.166 |  | 1710 | 1703 | -7 | -0.409 |
| **50** | 1791 | 1760 | -31 | -1.731 |  | 2106 | 2101 | -5 | -0.237 |  | 1985 | 1975 | -10 | -0.504 |
| **75** | 1930 | 1895 | -35 | -1.813 |  | 2280 | 2275 | -5 | -0.219 |  | 2145 | 2133 | -12 | -0.559 |
| **100** | 2028 | 1991 | -37 | -1.824 |  | 2404 | 2397 | -7 | -0.291 |  | 2258 | 2245 | -13 | -0.576 |
| **125** | 2105 | 2065 | -40 | -1.900 |  | 2499 | 2493 | -6 | -0.240 |  | 2345 | 2331 | -14 | -0.597 |
| **150** | 2167 | 2125 | -42 | -1.938 |  | 2577 | 2570 | -7 | -0.272 |  | 2416 | 2402 | -14 | -0.579 |
| **175** | 2219 | 2176 | -43 | -1.938 |  | 2643 | 2636 | -7 | -0.265 |  | 2477 | 2462 | -15 | -0.606 |
| **200** | 2265 | 2220 | -45 | -1.987 |  | 2700 | 2693 | -7 | -0.259 |  | 2529 | 2513 | -16 | -0.633 |
| **250** | 2341 | 2294 | -47 | -2.008 |  | 2796 | 2788 | -8 | -0.286 |  | 2616 | 2600 | -16 | -0.612 |
| **300** | 2403 | 2355 | -48 | -1.998 |  | 2874 | 2865 | -9 | -0.313 |  | 2688 | 2670 | -18 | -0.670 |
| **400** | 2501 | 2450 | -51 | -2.039 |  | 2997 | 2987 | -10 | -0.334 |  | 2800 | 2782 | -18 | -0.643 |
| **500** | 2577 | 2524 | -53 | -2.057 |  | 3092 | 3082 | -10 | -0.323 |  | 2887 | 2868 | -19 | -0.658 |

**Table S 6 Sangam quantile changes for GEV distribution.**

| **Return Period** | **GEV (Sangam)** | | | | | | | | | | | | | |
| --- | --- | --- | --- | --- | --- | --- | --- | --- | --- | --- | --- | --- | --- | --- |
| **MLE (BO)** | **MLE (AO)** | **Difference** | **Percentage** |  | **MOM (BO)** | **MOM (AO)** | **Difference** | **Percentage** |  | **LMOM (BO)** | **LMOM (AO)** | **Difference** | **Percentage** |
| **2** | 504 | 492 | -12 | -2.381 |  | 390 | 394 | 4 | 1.026 |  | 533 | 533 | 0 | 0.000 |
| **5** | 939 | 930 | -9 | -0.958 |  | 1572 | 1570 | -2 | -0.127 |  | 958 | 950 | -8 | -0.835 |
| **10** | 1363 | 1392 | 29 | 2.128 |  | 2431 | 2425 | -6 | -0.247 |  | 1314 | 1305 | -9 | -0.685 |
| **25** | 2128 | 2291 | 163 | 7.660 |  | 3613 | 3601 | -12 | -0.332 |  | 1871 | 1868 | -3 | -0.160 |
| **50** | 2926 | 3297 | 371 | 12.679 |  | 4566 | 4548 | -18 | -0.394 |  | 2378 | 2389 | 11 | 0.463 |
| **75** | 3509 | 4068 | 559 | 15.930 |  | 5151 | 5130 | -21 | -0.408 |  | 2717 | 2740 | 23 | 0.847 |
| **100** | 3985 | 4718 | 733 | 18.394 |  | 5580 | 5557 | -23 | -0.412 |  | 2979 | 3013 | 34 | 1.141 |
| **125** | 4396 | 5291 | 895 | 20.359 |  | 5920 | 5896 | -24 | -0.405 |  | 3195 | 3239 | 44 | 1.377 |
| **150** | 4761 | 5809 | 1048 | 22.012 |  | 6204 | 6178 | -26 | -0.419 |  | 3381 | 3434 | 53 | 1.568 |
| **175** | 5092 | 6286 | 1194 | 23.449 |  | 6448 | 6421 | -27 | -0.419 |  | 3545 | 3607 | 62 | 1.749 |
| **200** | 5396 | 6730 | 1334 | 24.722 |  | 6663 | 6634 | -29 | -0.435 |  | 3692 | 3762 | 70 | 1.896 |
| **250** | 5943 | 7541 | 1598 | 26.889 |  | 7027 | 6997 | -30 | -0.427 |  | 3948 | 4034 | 86 | 2.178 |
| **300** | 6429 | 8275 | 1846 | 28.714 |  | 7331 | 7299 | -32 | -0.437 |  | 4169 | 4268 | 99 | 2.375 |
| **400** | 7276 | 9578 | 2302 | 31.638 |  | 7822 | 7787 | -35 | -0.447 |  | 4539 | 4662 | 123 | 2.710 |
| **500** | 8005 | 10728 | 2723 | 34.016 |  | 8212 | 8175 | -37 | -0.451 |  | 4844 | 4990 | 146 | 3.014 |

**Table S 7 Sangam quantile changes for Gamma distribution**.

| **Return Period** | **GAMMA (Sangam)** | | | | | | | | | | | | | |
| --- | --- | --- | --- | --- | --- | --- | --- | --- | --- | --- | --- | --- | --- | --- |
| **MLE (BO)** | **MLE (AO)** | **Difference** | **Percentage** |  | **MOM (BO)** | **MOM (AO)** | **Difference** | **Percentage** |  | **LMOM (BO)** | **LMOM (AO)** | **Difference** | **Percentage** |
| **2** | 579 | 587 | 8 | 1.382 |  | 548 | 553 | 5 | 0.912 |  | 570 | 575 | 5 | 0.877 |
| **5** | 1026 | 1024 | -2 | -0.195 |  | 1057 | 1059 | 2 | 0.189 |  | 1035 | 1037 | 2 | 0.193 |
| **10** | 1329 | 1318 | -11 | -0.828 |  | 1414 | 1414 | 0 | 0.000 |  | 1354 | 1353 | -1 | -0.074 |
| **25** | 1708 | 1685 | -23 | -1.347 |  | 1870 | 1865 | -5 | -0.267 |  | 1755 | 1750 | -5 | -0.285 |
| **50** | 1985 | 1953 | -32 | -1.612 |  | 2207 | 2199 | -8 | -0.362 |  | 2050 | 2041 | -9 | -0.439 |
| **75** | 2145 | 2106 | -39 | -1.818 |  | 2402 | 2391 | -11 | -0.458 |  | 2219 | 2208 | -11 | -0.496 |
| **100** | 2256 | 2214 | -42 | -1.862 |  | 2539 | 2527 | -12 | -0.473 |  | 2338 | 2326 | -12 | -0.513 |
| **125** | 2343 | 2297 | -46 | -1.963 |  | 2645 | 2632 | -13 | -0.491 |  | 2430 | 2417 | -13 | -0.535 |
| **150** | 2413 | 2365 | -48 | -1.989 |  | 2732 | 2718 | -14 | -0.512 |  | 2505 | 2491 | -14 | -0.559 |
| **175** | 2472 | 2422 | -50 | -2.023 |  | 2805 | 2790 | -15 | -0.535 |  | 2568 | 2553 | -15 | -0.584 |
| **200** | 2523 | 2471 | -52 | -2.061 |  | 2868 | 2852 | -16 | -0.558 |  | 2623 | 2607 | -16 | -0.610 |
| **250** | 2608 | 2553 | -55 | -2.109 |  | 2973 | 2956 | -17 | -0.572 |  | 2714 | 2696 | -18 | -0.663 |
| **300** | 2678 | 2620 | -58 | -2.166 |  | 3059 | 3041 | -18 | -0.588 |  | 2788 | 2769 | -19 | -0.681 |
| **400** | 2787 | 2725 | -62 | -2.225 |  | 3194 | 3175 | -19 | -0.595 |  | 2904 | 2884 | -20 | -0.689 |
| **500** | 2871 | 2806 | -65 | -2.264 |  | 3298 | 3278 | -20 | -0.606 |  | 2994 | 2973 | -21 | -0.701 |

**Table S 8 Sangam quantile changes for LP3 distribution**

| **Return Period** | **LOG PEARSON 3 (Sangam)** | | | | | | | | | | | | | |
| --- | --- | --- | --- | --- | --- | --- | --- | --- | --- | --- | --- | --- | --- | --- |
| **MLE (BO)** | **MLE (AO)** | **Difference** | **Percentage** |  | **MOM (BO)** | **MOM (AO)** | **Difference** | **Percentage** |  | **LMOM (BO)** | **LMOM (AO)** | **Difference** | **Percentage** |
| **2** | 515 | 502 | -13 | -2.524 |  | 529 | 519 | -10 | -1.890 |  | 515 | 508 | -7 | -1.351 |
| **5** | 959 | 943 | -16 | -1.668 |  | 985 | 955 | -30 | -3.046 |  | 979 | 958 | -21 | -2.120 |
| **10** | 1352 | 1366 | 14 | 1.036 |  | 1357 | 1341 | -16 | -1.179 |  | 1387 | 1381 | -6 | -0.422 |
| **25** | 1977 | 2094 | 117 | 5.918 |  | 1906 | 1958 | 52 | 2.728 |  | 2032 | 2096 | 64 | 3.140 |
| **50** | 2546 | 2811 | 265 | 10.408 |  | 2371 | 2523 | 152 | 6.411 |  | 2615 | 2785 | 170 | 6.509 |
| **75** | 2924 | 3312 | 388 | 13.269 |  | 2663 | 2899 | 236 | 8.862 |  | 2999 | 3260 | 261 | 8.700 |
| **100** | 3213 | 3710 | 497 | 15.468 |  | 2881 | 3189 | 308 | 10.691 |  | 3293 | 3634 | 341 | 10.345 |
| **125** | 3451 | 4044 | 593 | 17.183 |  | 3056 | 3427 | 371 | 12.140 |  | 3534 | 3946 | 412 | 11.670 |
| **150** | 3655 | 4335 | 680 | 18.605 |  | 3203 | 3631 | 428 | 13.362 |  | 3739 | 4217 | 478 | 12.784 |
| **175** | 3833 | 4595 | 762 | 19.880 |  | 3329 | 3810 | 481 | 14.449 |  | 3919 | 4457 | 539 | 13.748 |
| **200** | 3993 | 4831 | 838 | 20.987 |  | 3441 | 3971 | 530 | 15.402 |  | 4079 | 4675 | 595 | 14.598 |
| **250** | 4271 | 5247 | 976 | 22.852 |  | 3633 | 4250 | 617 | 16.983 |  | 4357 | 5057 | 699 | 16.052 |
| **300** | 4508 | 5610 | 1102 | 24.445 |  | 3794 | 4489 | 695 | 18.318 |  | 4594 | 5388 | 793 | 17.269 |
| **400** | 4902 | 6226 | 1324 | 27.009 |  | 4055 | 4888 | 833 | 20.543 |  | 4987 | 5947 | 960 | 19.245 |
| **500** | 5225 | 6744 | 1519 | 29.072 |  | 4264 | 5215 | 951 | 22.303 |  | 5308 | 6413 | 1105 | 20.823 |

**Table S9: Quantile results Munshibagh station before and after outlier.**

| **Before Treating the Outliers** | | | | | | | | | | | | |
| --- | --- | --- | --- | --- | --- | --- | --- | --- | --- | --- | --- | --- |
| **Return Period** | **GUMBEL** | | | **GEV** | | | **GAMMA** | | | **LOG PEARSON 3** | | |
| **MLE** | **MOM** | **LMOM** | **MLE** | **MOM** | **LMOM** | **MLE** | **MOM** | **LMOM** | **MLE** | **MOM** | **LMOM** |
| **2** | 612 | 611 | 612.03 | 611 | 480.37 | 616 | 612 | 609 | 615.44 | 608 | 616 | 620.42 |
| **5** | 915 | 917 | 914.65 | 915 | 1227.86 | 923 | 926 | 929 | 917.49 | 928 | 939 | 939.15 |
| **10** | 1116 | 1120 | 1115.01 | 1118 | 1771.48 | 1121 | 1126 | 1132 | 1107.93 | 1132 | 1134 | 1127.48 |
| **25** | 1370 | 1376 | 1368.17 | 1374 | 2519.34 | 1368 | 1366 | 1378 | 1336.97 | 1379 | 1358 | 1337.65 |
| **50** | 1559 | 1566 | 1555.98 | 1565 | 3121.8 | 1547 | 1538 | 1554 | 1499.61 | 1552 | 1509 | 1475.36 |
| **75** | 1668 | 1676 | 1665.14 | 1677 | 3491.95 | 1650 | 1635 | 1653 | 1591.72 | 1650 | 1590 | 1549.04 |
| **100** | 1746 | 1754 | 1742.4 | 1756 | 3763.23 | 1722 | 1703 | 1723 | 1655.96 | 1718 | 1646 | 1598.59 |
| **125** | 1806 | 1815 | 1802.24 | 1817 | 3978.83 | 1778 | 1755 | 1776 | 1705.23 | 1770 | 1687 | 1635.58 |
| **150** | 1855 | 1864 | 1851.1 | 1867 | 4158.46 | 1823 | 1797 | 1819 | 1745.14 | 1812 | 1721 | 1664.91 |
| **175** | 1896 | 1906 | 1892.39 | 1909 | 4312.83 | 1861 | 1833 | 1855 | 1778.66 | 1847 | 1748 | 1689.1 |
| **200** | 1932 | 1942 | 1928.14 | 1946 | 4448.44 | 1894 | 1863 | 1887 | 1807.55 | 1877 | 1772 | 1709.63 |
| **250** | 1992 | 2002 | 1987.85 | 2007 | 4679.04 | 1948 | 1914 | 1939 | 1855.51 | 1927 | 1810 | 1743.06 |
| **300** | 2041 | 2052 | 2036.62 | 2057 | 4871.25 | 1993 | 1955 | 1981 | 1894.42 | 1967 | 1841 | 1769.6 |
| **400** | 2118 | 2129 | 2113.54 | 2136 | 5181.64 | 2062 | 2020 | 2047 | 1955.37 | 2029 | 1888 | 1810.12 |
| **500** | 2178 | 2190 | 2173.18 | 2198 | 5428.54 | 2116 | 2069 | 2098 | 2002.28 | 2077 | 1924 | 1840.45 |
|  |  |  |  |  |  |  |  |  |  |  |  |  |
| **After Treating the Outliers** | | | | | | | | | | | | |
| **Return Period** | **GUMBEL** | | | **GEV** | | | **GAMMA** | | | **LOG PEARSON 3** | | |
| **MLE** | **MOM** | **LMOM** | **MLE** | **MOM** | **LMOM** | **MLE** | **MOM** | **LMOM** | **MLE** | **MOM** | **LMOM** |
| **2** | 615 | 616 | 616.67 | 607 | 486.67 | 615 | 619 | 615 | 621.16 | 608 | 605 | 614.87 |
| **5** | 907 | 917 | 914.02 | 906 | 1223.64 | 917 | 922 | 930 | 917.65 | 918 | 919 | 926.6 |
| **10** | 1100 | 1117 | 1110.89 | 1113 | 1759.61 | 1117 | 1114 | 1129 | 1103.85 | 1123 | 1131 | 1125.73 |
| **25** | 1344 | 1369 | 1359.64 | 1385 | 2496.94 | 1371 | 1344 | 1370 | 1327.27 | 1378 | 1400 | 1365.66 |
| **50** | 1525 | 1557 | 1544.18 | 1595 | 3090.92 | 1560 | 1507 | 1542 | 1485.65 | 1565 | 1599 | 1535.38 |
| **75** | 1630 | 1665 | 1651.43 | 1720 | 3455.86 | 1670 | 1600 | 1639 | 1575.28 | 1672 | 1715 | 1631.01 |
| **100** | 1704 | 1742 | 1727.35 | 1809 | 3723.31 | 1748 | 1664 | 1707 | 1637.75 | 1748 | 1797 | 1697.44 |
| **125** | 1762 | 1802 | 1786.15 | 1880 | 3935.88 | 1808 | 1714 | 1759 | 1685.65 | 1806 | 1861 | 1748.21 |
| **150** | 1809 | 1851 | 1834.16 | 1938 | 4112.98 | 1858 | 1754 | 1801 | 1724.44 | 1854 | 1913 | 1789.22 |
| **175** | 1849 | 1892 | 1874.73 | 1987 | 4265.18 | 1900 | 1787 | 1837 | 1757.02 | 1894 | 1957 | 1823.59 |
| **200** | 1884 | 1928 | 1909.85 | 2030 | 4398.88 | 1936 | 1816 | 1867 | 1785.08 | 1928 | 1995 | 1853.13 |
| **250** | 1941 | 1987 | 1968.53 | 2103 | 4626.23 | 1996 | 1865 | 1918 | 1831.67 | 1986 | 2059 | 1902.04 |
| **300** | 1988 | 2036 | 2016.45 | 2163 | 4815.73 | 2046 | 1904 | 1959 | 1869.47 | 2033 | 2111 | 1941.59 |
| **400** | 2062 | 2112 | 2092.03 | 2258 | 5121.75 | 2124 | 1965 | 2024 | 1928.65 | 2107 | 2194 | 2003.29 |
| **500** | 2120 | 2172 | 2150.64 | 2333 | 5365.18 | 2184 | 2012 | 2074 | 1974.19 | 2164 | 2257 | 2050.55 |

**Table S10: Munshibagh quantile changes for Gumbel distribution.**

| **Return Period** | **GUMBEL (Munshibagh)** | | | | | | | | | | | | | |
| --- | --- | --- | --- | --- | --- | --- | --- | --- | --- | --- | --- | --- | --- | --- |
| **MLE (BO)** | **MLE (AO)** | **Difference** | **Percentage** |  | **MOM (BO)** | **MOM (AO)** | **Difference** | **Percentage** |  | **LMOM (BO)** | **LMOM (AO)** | **Difference** | **Percentage** |
| **2** | 612 | 615 | 3 | 0.490 |  | 611 | 616 | 5 | 0.818 |  | 612 | 617 | 5 | 0.758 |
| **5** | 915 | 907 | -8 | -0.874 |  | 917 | 917 | 0 | 0.000 |  | 915 | 914 | -1 | -0.069 |
| **10** | 1116 | 1100 | -16 | -1.434 |  | 1120 | 1117 | -3 | -0.268 |  | 1115 | 1111 | -4 | -0.370 |
| **25** | 1370 | 1344 | -26 | -1.898 |  | 1376 | 1369 | -7 | -0.509 |  | 1368 | 1360 | -9 | -0.623 |
| **50** | 1559 | 1525 | -34 | -2.181 |  | 1566 | 1557 | -9 | -0.575 |  | 1556 | 1544 | -12 | -0.758 |
| **75** | 1668 | 1630 | -38 | -2.278 |  | 1676 | 1665 | -11 | -0.656 |  | 1665 | 1651 | -14 | -0.823 |
| **100** | 1746 | 1704 | -42 | -2.405 |  | 1754 | 1742 | -12 | -0.684 |  | 1742 | 1727 | -15 | -0.864 |
| **125** | 1806 | 1762 | -44 | -2.436 |  | 1815 | 1802 | -13 | -0.716 |  | 1802 | 1786 | -16 | -0.893 |
| **150** | 1855 | 1809 | -46 | -2.480 |  | 1864 | 1851 | -13 | -0.697 |  | 1851 | 1834 | -17 | -0.915 |
| **175** | 1896 | 1849 | -47 | -2.479 |  | 1906 | 1892 | -14 | -0.735 |  | 1892 | 1875 | -18 | -0.933 |
| **200** | 1932 | 1884 | -48 | -2.484 |  | 1942 | 1928 | -14 | -0.721 |  | 1928 | 1910 | -18 | -0.949 |
| **250** | 1992 | 1941 | -51 | -2.560 |  | 2002 | 1987 | -15 | -0.749 |  | 1988 | 1969 | -19 | -0.972 |
| **300** | 2041 | 1988 | -53 | -2.597 |  | 2052 | 2036 | -16 | -0.780 |  | 2037 | 2016 | -20 | -0.990 |
| **400** | 2118 | 2062 | -56 | -2.644 |  | 2129 | 2112 | -17 | -0.798 |  | 2114 | 2092 | -22 | -1.018 |
| **500** | 2178 | 2120 | -58 | -2.663 |  | 2190 | 2172 | -18 | -0.822 |  | 2173 | 2151 | -23 | -1.037 |

**Table S11: Munshibagh quantile changes for GEV distribution.**

| **Return Period** | **GEV (Munshibagh)** | | | | | | | | | | | | | |
| --- | --- | --- | --- | --- | --- | --- | --- | --- | --- | --- | --- | --- | --- | --- |
| **MLE (BO)** | **MLE (AO)** | **Difference** | **Percentage** |  | **MOM (BO)** | **MOM (AO)** | **Difference** | **Percentage** |  | **LMOM (BO)** | **LMOM (AO)** | **Difference** | **Percentage** |
| **2** | 611 | 607 | -4 | -0.655 |  | 480 | 487 | 6 | 1.311 |  | 616 | 615 | -1 | -0.162 |
| **5** | 915 | 906 | -9 | -0.984 |  | 1228 | 1224 | -4 | -0.344 |  | 923 | 917 | -6 | -0.650 |
| **10** | 1118 | 1113 | -5 | -0.447 |  | 1771 | 1760 | -12 | -0.670 |  | 1121 | 1117 | -4 | -0.357 |
| **25** | 1374 | 1385 | 11 | 0.801 |  | 2519 | 2497 | -22 | -0.889 |  | 1368 | 1371 | 3 | 0.219 |
| **50** | 1565 | 1595 | 30 | 1.917 |  | 3122 | 3091 | -31 | -0.989 |  | 1547 | 1560 | 13 | 0.840 |
| **75** | 1677 | 1720 | 43 | 2.564 |  | 3492 | 3456 | -36 | -1.034 |  | 1650 | 1670 | 20 | 1.212 |
| **100** | 1756 | 1809 | 53 | 3.018 |  | 3763 | 3723 | -40 | -1.061 |  | 1722 | 1748 | 26 | 1.510 |
| **125** | 1817 | 1880 | 63 | 3.467 |  | 3979 | 3936 | -43 | -1.079 |  | 1778 | 1808 | 30 | 1.687 |
| **150** | 1867 | 1938 | 71 | 3.803 |  | 4158 | 4113 | -45 | -1.094 |  | 1823 | 1858 | 35 | 1.920 |
| **175** | 1909 | 1987 | 78 | 4.086 |  | 4313 | 4265 | -48 | -1.105 |  | 1861 | 1900 | 39 | 2.096 |
| **200** | 1946 | 2030 | 84 | 4.317 |  | 4448 | 4399 | -50 | -1.114 |  | 1894 | 1936 | 42 | 2.218 |
| **250** | 2007 | 2103 | 96 | 4.783 |  | 4679 | 4626 | -53 | -1.129 |  | 1948 | 1996 | 48 | 2.464 |
| **300** | 2057 | 2163 | 106 | 5.153 |  | 4871 | 4816 | -56 | -1.140 |  | 1993 | 2046 | 53 | 2.659 |
| **400** | 2136 | 2258 | 122 | 5.712 |  | 5182 | 5122 | -60 | -1.156 |  | 2062 | 2124 | 62 | 3.007 |
| **500** | 2198 | 2333 | 135 | 6.142 |  | 5429 | 5365 | -63 | -1.167 |  | 2116 | 2184 | 68 | 3.214 |

**Table S 12: Munshibagh quantile changes for Gamma distribution.**

| **Return Period** | **GAMMA (Munshibagh)** | | | | | | | | | | | | | |
| --- | --- | --- | --- | --- | --- | --- | --- | --- | --- | --- | --- | --- | --- | --- |
| **MLE (BO)** | **MLE (AO)** | **Difference** | **Percentage** |  | **MOM (BO)** | **MOM (AO)** | **Difference** | **Percentage** |  | **LMOM (BO)** | **LMOM (AO)** | **Difference** | **Percentage** |
| **2** | 612 | 619 | 7 | 1.144 |  | 609 | 615 | 6 | 0.985 |  | 615 | 621 | 6 | 0.929 |
| **5** | 926 | 922 | -4 | -0.432 |  | 929 | 930 | 1 | 0.108 |  | 917 | 918 | 0 | 0.017 |
| **10** | 1126 | 1114 | -12 | -1.066 |  | 1132 | 1129 | -3 | -0.265 |  | 1108 | 1104 | -4 | -0.368 |
| **25** | 1366 | 1344 | -22 | -1.611 |  | 1378 | 1370 | -8 | -0.581 |  | 1337 | 1327 | -10 | -0.726 |
| **50** | 1538 | 1507 | -31 | -2.016 |  | 1554 | 1542 | -12 | -0.772 |  | 1500 | 1486 | -14 | -0.931 |
| **75** | 1635 | 1600 | -35 | -2.141 |  | 1653 | 1639 | -14 | -0.847 |  | 1592 | 1575 | -16 | -1.033 |
| **100** | 1703 | 1664 | -39 | -2.290 |  | 1723 | 1707 | -16 | -0.929 |  | 1656 | 1638 | -18 | -1.100 |
| **125** | 1755 | 1714 | -41 | -2.336 |  | 1776 | 1759 | -17 | -0.957 |  | 1705 | 1686 | -20 | -1.148 |
| **150** | 1797 | 1754 | -43 | -2.393 |  | 1819 | 1801 | -18 | -0.990 |  | 1745 | 1724 | -21 | -1.186 |
| **175** | 1833 | 1787 | -46 | -2.510 |  | 1855 | 1837 | -18 | -0.970 |  | 1779 | 1757 | -22 | -1.217 |
| **200** | 1863 | 1816 | -47 | -2.523 |  | 1887 | 1867 | -20 | -1.060 |  | 1808 | 1785 | -22 | -1.243 |
| **250** | 1914 | 1865 | -49 | -2.560 |  | 1939 | 1918 | -21 | -1.083 |  | 1856 | 1832 | -24 | -1.285 |
| **300** | 1955 | 1904 | -51 | -2.609 |  | 1981 | 1959 | -22 | -1.111 |  | 1894 | 1869 | -25 | -1.317 |
| **400** | 2020 | 1965 | -55 | -2.723 |  | 2047 | 2024 | -23 | -1.124 |  | 1955 | 1929 | -27 | -1.366 |
| **500** | 2069 | 2012 | -57 | -2.755 |  | 2098 | 2074 | -24 | -1.144 |  | 2002 | 1974 | -28 | -1.403 |

**Table S 13: Munshibagh quantile changes for LP3 distribution.**

| **Return Period** | **LOG PEARSON 3 (Munshibagh)** | | | | | | | | | | | | | |
| --- | --- | --- | --- | --- | --- | --- | --- | --- | --- | --- | --- | --- | --- | --- |
| **MLE (BO)** | **MLE (AO)** | **Difference** | **Percentage** |  | **MOM (BO)** | **MOM (AO)** | **Difference** | **Percentage** |  | **LMOM (BO)** | **LMOM (AO)** | **Difference** | **Percentage** |
| **2** | 608 | 608 | 0 | 0.000 |  | 616 | 605 | -11 | -1.786 |  | 620 | 615 | -6 | -0.895 |
| **5** | 928 | 918 | -10 | -1.078 |  | 939 | 919 | -20 | -2.130 |  | 939 | 927 | -13 | -1.336 |
| **10** | 1132 | 1123 | -9 | -0.795 |  | 1134 | 1131 | -3 | -0.265 |  | 1127 | 1126 | -2 | -0.155 |
| **25** | 1379 | 1378 | -1 | -0.073 |  | 1358 | 1400 | 42 | 3.093 |  | 1338 | 1366 | 28 | 2.094 |
| **50** | 1552 | 1565 | 13 | 0.838 |  | 1509 | 1599 | 90 | 5.964 |  | 1475 | 1535 | 60 | 4.068 |
| **75** | 1650 | 1672 | 22 | 1.333 |  | 1590 | 1715 | 125 | 7.862 |  | 1549 | 1631 | 82 | 5.292 |
| **100** | 1718 | 1748 | 30 | 1.746 |  | 1646 | 1797 | 151 | 9.174 |  | 1599 | 1697 | 99 | 6.184 |
| **125** | 1770 | 1806 | 36 | 2.034 |  | 1687 | 1861 | 174 | 10.314 |  | 1636 | 1748 | 113 | 6.886 |
| **150** | 1812 | 1854 | 42 | 2.318 |  | 1721 | 1913 | 192 | 11.156 |  | 1665 | 1789 | 124 | 7.466 |
| **175** | 1847 | 1894 | 47 | 2.545 |  | 1748 | 1957 | 209 | 11.957 |  | 1689 | 1824 | 134 | 7.962 |
| **200** | 1877 | 1928 | 51 | 2.717 |  | 1772 | 1995 | 223 | 12.585 |  | 1710 | 1853 | 144 | 8.394 |
| **250** | 1927 | 1986 | 59 | 3.062 |  | 1810 | 2059 | 249 | 13.757 |  | 1743 | 1902 | 159 | 9.121 |
| **300** | 1967 | 2033 | 66 | 3.355 |  | 1841 | 2111 | 270 | 14.666 |  | 1770 | 1942 | 172 | 9.719 |
| **400** | 2029 | 2107 | 78 | 3.844 |  | 1888 | 2194 | 306 | 16.208 |  | 1810 | 2003 | 193 | 10.672 |
| **500** | 2077 | 2164 | 87 | 4.189 |  | 1924 | 2257 | 333 | 17.308 |  | 1840 | 2051 | 210 | 11.416 |

**Table S 14: Quantile results Asham station before and after outlier**.

| **Before Treating the Outliers** | | | | | | | | | | | | |
| --- | --- | --- | --- | --- | --- | --- | --- | --- | --- | --- | --- | --- |
| **Return Period** | **GUMBEL** | | | **GEV** | | | **GAMMA** | | | **LOG PEARSON 3** | | |
| **MLE** | **MOM** | **LMOM** | **MLE** | **MOM** | **LMOM** | **MLE** | **MOM** | **LMOM** | **MLE** | **MOM** | **LMOM** | |
| **2** | 634.4 | 634 | 632.84 | 641 | 513.83 | 641 | 640 | 638 | 640.84 | 646 | 642 | 641.28 | |
| **5** | 928.84 | 915 | 921.51 | 923 | 1200.69 | 934 | 931 | 930 | 923.9 | 938 | 944 | 946.64 | |
| **10** | 1123.78 | 1101 | 1112.63 | 1103 | 1700.22 | 1118 | 1112 | 1113 | 1099.77 | 1111 | 1126 | 1131.45 | |
| **25** | 1370.09 | 1337 | 1354.12 | 1321 | 2387.41 | 1342 | 1329 | 1331 | 1309.49 | 1308 | 1333 | 1343.86 | |
| **50** | 1552.81 | 1511 | 1533.27 | 1477 | 2941 | 1501 | 1482 | 1485 | 1457.49 | 1440 | 1473 | 1487.55 | |
| **75** | 1659.02 | 1612 | 1637.4 | 1565 | 3281.13 | 1591 | 1569 | 1572 | 1541.04 | 1511 | 1549 | 1566.2 | |
| **100** | 1734.19 | 1684 | 1711.09 | 1627 | 3530.4 | 1653 | 1629 | 1633 | 1599.2 | 1560 | 1600 | 1619.86 | |
| **125** | 1792.42 | 1740 | 1768.18 | 1674 | 3728.51 | 1701 | 1675 | 1679 | 1643.74 | 1597 | 1639 | 1660.34 | |
| **150** | 1839.96 | 1785 | 1814.79 | 1712 | 3893.57 | 1740 | 1713 | 1717 | 1679.8 | 1626 | 1670 | 1692.72 | |
| **175** | 1880.13 | 1824 | 1854.17 | 1745 | 4035.42 | 1772 | 1744 | 1749 | 1710.06 | 1650 | 1696 | 1719.61 | |
| **200** | 1914.91 | 1857 | 1888.27 | 1772 | 4160.03 | 1800 | 1771 | 1776 | 1736.12 | 1671 | 1718 | 1742.57 | |
| **250** | 1973 | 1912 | 1945.23 | 1818 | 4371.93 | 1846 | 1816 | 1821 | 1779.36 | 1704 | 1754 | 1780.25 | |
| **300** | 2020.45 | 1958 | 1991.75 | 1855 | 4548.54 | 1884 | 1852 | 1858 | 1814.41 | 1731 | 1783 | 1810.42 | |
| **400** | 2095.3 | 2029 | 2065.13 | 1913 | 4833.75 | 1942 | 1909 | 1915 | 1869.26 | 1773 | 1828 | 1856.95 | |
| **500** | 2153.33 | 2084 | 2122.02 | 1957 | 5060.63 | 1986 | 1953 | 1959 | 1911.44 | 1804 | 1861 | 1892.16 | |
|  |  |  |  |  |  |  |  |  |  |  |  |  | |
| **After Treating the Outliers** | | | | | | | | | | | | |
| **Return Period** | **GUMBEL** | | | **GEV** | | | **GAMMA** | | | **LOG PEARSON 3** | | |
| **MLE** | **MOM** | **LMOM** | **MLE** | **MOM** | **LMOM** | **MLE** | **MOM** | **LMOM** | **MLE** | **MOM** | **LMOM** | |
| **2** | 642 | 645 | 643.65 | 634 | 528.41 | 642 | 653 | 650 | 653.55 | 639 | 635 | 636.4 | |
| **5** | 911 | 916 | 920.91 | 910 | 1191.82 | 924 | 927 | 932 | 924.66 | 920 | 920 | 928.37 | |
| **10** | 1089 | 1096 | 1104.48 | 1102 | 1674.29 | 1110 | 1096 | 1106 | 1091.7 | 1106 | 1115 | 1126.2 | |
| **25** | 1314 | 1323 | 1336.42 | 1356 | 2338.02 | 1347 | 1298 | 1314 | 1289.92 | 1340 | 1364 | 1379.45 | |
| **50** | 1481 | 1492 | 1508.49 | 1552 | 2872.72 | 1523 | 1439 | 1460 | 1429.3 | 1513 | 1552 | 1569.88 | |
| **75** | 1578 | 1590 | 1608.5 | 1669 | 3201.23 | 1626 | 1519 | 1543 | 1507.83 | 1613 | 1663 | 1681.73 | |
| **100** | 1647 | 1659 | 1679.29 | 1754 | 3441.99 | 1698 | 1574 | 1601 | 1562.44 | 1684 | 1742 | 1761.49 | |
| **125** | 1700 | 1713 | 1734.12 | 1820 | 3633.34 | 1754 | 1617 | 1645 | 1604.23 | 1739 | 1804 | 1823.63 | |
| **150** | 1743 | 1756 | 1778.88 | 1875 | 3792.76 | 1800 | 1651 | 1680 | 1638.04 | 1785 | 1855 | 1874.6 | |
| **175** | 1780 | 1793 | 1816.71 | 1922 | 3929.77 | 1839 | 1680 | 1710 | 1666.41 | 1823 | 1898 | 1917.84 | |
| **200** | 1812 | 1826 | 1849.46 | 1962 | 4050.12 | 1873 | 1705 | 1736 | 1690.82 | 1856 | 1935 | 1955.42 | |
| **250** | 1865 | 1879 | 1904.17 | 2031 | 4254.79 | 1929 | 1746 | 1778 | 1731.31 | 1911 | 1998 | 2018.47 | |
| **300** | 1908 | 1923 | 1948.85 | 2088 | 4425.37 | 1975 | 1780 | 1813 | 1764.13 | 1956 | 2050 | 2070.24 | |
| **400** | 1977 | 1992 | 2019.32 | 2178 | 4700.84 | 2048 | 1832 | 1867 | 1815.45 | 2028 | 2132 | 2152.41 | |
| **500** | 2030 | 2045 | 2073.97 | 2249 | 4919.98 | 2104 | 1872 | 1909 | 1854.9 | 2083 | 2196 | 2216.57 | |

**Table S15: Asham quantile changes for Gumbel distribution.**

| **Return Period** |  | **GUMBEL (Asham)** | | | | | | | | | | | | | |
| --- | --- | --- | --- | --- | --- | --- | --- | --- | --- | --- | --- | --- | --- | --- | --- |
|  | **MLE (BO)** | **MLE (AO)** | **Difference** | **Percentage** |  | **MOM (BO)** | **MOM (AO)** | **Difference** | **Percentage** |  | **LMOM (BO)** | **LMOM (AO)** | **Difference** | **Percentage** |
| **2** |  | 634 | 642 | 8 | 1.198 |  | 634 | 645 | 11 | 1.735 |  | 633 | 643.65 | 11 | 1.708 |
| **5** |  | 929 | 911 | -18 | -1.921 |  | 915 | 916 | 1 | 0.109 |  | 922 | 920.91 | -1 | -0.065 |
| **10** |  | 1124 | 1089 | -35 | -3.095 |  | 1101 | 1096 | -5 | -0.454 |  | 1113 | 1104.48 | -8 | -0.732 |
| **25** |  | 1370 | 1314 | -56 | -4.094 |  | 1337 | 1323 | -14 | -1.047 |  | 1354 | 1336.42 | -18 | -1.307 |
| **50** |  | 1553 | 1481 | -72 | -4.625 |  | 1511 | 1492 | -19 | -1.257 |  | 1533 | 1508.49 | -25 | -1.616 |
| **75** |  | 1659 | 1578 | -81 | -4.884 |  | 1612 | 1590 | -22 | -1.365 |  | 1637 | 1608.5 | -29 | -1.765 |
| **100** |  | 1734 | 1647 | -87 | -5.028 |  | 1684 | 1659 | -25 | -1.485 |  | 1711 | 1679.29 | -32 | -1.858 |
| **125** |  | 1792 | 1700 | -92 | -5.156 |  | 1740 | 1713 | -27 | -1.552 |  | 1768 | 1734.12 | -34 | -1.926 |
| **150** |  | 1840 | 1743 | -97 | -5.270 |  | 1785 | 1756 | -29 | -1.625 |  | 1815 | 1778.88 | -36 | -1.979 |
| **175** |  | 1880 | 1780 | -100 | -5.326 |  | 1824 | 1793 | -31 | -1.700 |  | 1854 | 1816.71 | -37 | -2.020 |
| **200** |  | 1915 | 1812 | -103 | -5.374 |  | 1857 | 1826 | -31 | -1.669 |  | 1888 | 1849.46 | -39 | -2.055 |
| **250** |  | 1973 | 1865 | -108 | -5.474 |  | 1912 | 1879 | -33 | -1.726 |  | 1945 | 1904.17 | -41 | -2.111 |
| **300** |  | 2020 | 1908 | -112 | -5.566 |  | 1958 | 1923 | -35 | -1.788 |  | 1992 | 1948.85 | -43 | -2.154 |
| **400** |  | 2095 | 1977 | -118 | -5.646 |  | 2029 | 1992 | -37 | -1.824 |  | 2065 | 2019.32 | -46 | -2.218 |
| **500** |  | 2153 | 2030 | -123 | -5.727 |  | 2084 | 2045 | -39 | -1.871 |  | 2122 | 2073.97 | -48 | -2.264 |

**Table S 16: Asham quantile changes for GEV distribution.**

| **Return Period** | **GEV (Asham)** | | | | | | | | | | | | | |
| --- | --- | --- | --- | --- | --- | --- | --- | --- | --- | --- | --- | --- | --- | --- |
| **MLE (BO)** | **MLE (AO)** | **Difference** | **Percentage** |  | **MOM (BO)** | **MOM (AO)** | **Difference** | **Percentage** |  | **LMOM (BO)** | **LMOM (AO)** | **Difference** | **Percentage** |
| **2** | 641 | 634 | -7 | -1.092 |  | 514 | 528 | 15 | 2.838 |  | 641 | 642 | 1 | 0.156 |
| **5** | 923 | 910 | -13 | -1.408 |  | 1201 | 1192 | -9 | -0.739 |  | 934 | 924 | -10 | -1.071 |
| **10** | 1103 | 1102 | -1 | -0.091 |  | 1700 | 1674 | -26 | -1.525 |  | 1118 | 1110 | -8 | -0.716 |
| **25** | 1321 | 1356 | 35 | 2.650 |  | 2387 | 2338 | -49 | -2.069 |  | 1342 | 1347 | 5 | 0.373 |
| **50** | 1477 | 1552 | 75 | 5.078 |  | 2941 | 2873 | -68 | -2.322 |  | 1501 | 1523 | 22 | 1.466 |
| **75** | 1565 | 1669 | 104 | 6.645 |  | 3281 | 3201 | -80 | -2.435 |  | 1591 | 1626 | 35 | 2.200 |
| **100** | 1627 | 1754 | 127 | 7.806 |  | 3530 | 3442 | -88 | -2.504 |  | 1653 | 1698 | 45 | 2.722 |
| **125** | 1674 | 1820 | 146 | 8.722 |  | 3729 | 3633 | -95 | -2.552 |  | 1701 | 1754 | 53 | 3.116 |
| **150** | 1712 | 1875 | 163 | 9.521 |  | 3894 | 3793 | -101 | -2.589 |  | 1740 | 1800 | 60 | 3.448 |
| **175** | 1745 | 1922 | 177 | 10.143 |  | 4035 | 3930 | -106 | -2.618 |  | 1772 | 1839 | 67 | 3.781 |
| **200** | 1772 | 1962 | 190 | 10.722 |  | 4160 | 4050 | -110 | -2.642 |  | 1800 | 1873 | 73 | 4.056 |
| **250** | 1818 | 2031 | 213 | 11.716 |  | 4372 | 4255 | -117 | -2.679 |  | 1846 | 1929 | 83 | 4.496 |
| **300** | 1855 | 2088 | 233 | 12.561 |  | 4549 | 4425 | -123 | -2.708 |  | 1884 | 1975 | 91 | 4.830 |
| **400** | 1913 | 2178 | 265 | 13.853 |  | 4834 | 4701 | -133 | -2.750 |  | 1942 | 2048 | 106 | 5.458 |
| **500** | 1957 | 2249 | 292 | 14.921 |  | 5061 | 4920 | -141 | -2.779 |  | 1986 | 2104 | 118 | 5.942 |

**Table S 17: Asham quantile changes for Gamma distribution.**

| **Return Period** | **GAMMA (Asham)** | | | | | | | | | | | | | |
| --- | --- | --- | --- | --- | --- | --- | --- | --- | --- | --- | --- | --- | --- | --- |
| **MLE (BO)** | **MLE (AO)** | **Difference** | **Percentage** |  | **MOM (BO)** | **MOM (AO)** | **Difference** | **Percentage** |  | **LMOM (BO)** | **LMOM (AO)** | **Difference** | **Percentage** |
| **2** | 640 | 653 | 13 | 2.031 |  | 638 | 650 | 12 | 1.881 |  | 641 | 654 | 13 | 1.983 |
| **5** | 931 | 927 | -4 | -0.430 |  | 930 | 932 | 2 | 0.215 |  | 924 | 925 | 1 | 0.082 |
| **10** | 1112 | 1096 | -16 | -1.439 |  | 1113 | 1106 | -7 | -0.629 |  | 1100 | 1092 | -8 | -0.734 |
| **25** | 1329 | 1298 | -31 | -2.333 |  | 1331 | 1314 | -17 | -1.277 |  | 1309 | 1290 | -20 | -1.494 |
| **50** | 1482 | 1439 | -43 | -2.901 |  | 1485 | 1460 | -25 | -1.684 |  | 1457 | 1429 | -28 | -1.934 |
| **75** | 1569 | 1519 | -50 | -3.187 |  | 1572 | 1543 | -29 | -1.845 |  | 1541 | 1508 | -33 | -2.155 |
| **100** | 1629 | 1574 | -55 | -3.376 |  | 1633 | 1601 | -32 | -1.960 |  | 1599 | 1562 | -37 | -2.299 |
| **125** | 1675 | 1617 | -58 | -3.463 |  | 1679 | 1645 | -34 | -2.025 |  | 1644 | 1604 | -40 | -2.404 |
| **150** | 1713 | 1651 | -62 | -3.619 |  | 1717 | 1680 | -37 | -2.155 |  | 1680 | 1638 | -42 | -2.486 |
| **175** | 1744 | 1680 | -64 | -3.670 |  | 1749 | 1710 | -39 | -2.230 |  | 1710 | 1666 | -44 | -2.553 |
| **200** | 1771 | 1705 | -66 | -3.727 |  | 1776 | 1736 | -40 | -2.252 |  | 1736 | 1691 | -45 | -2.609 |
| **250** | 1816 | 1746 | -70 | -3.855 |  | 1821 | 1778 | -43 | -2.361 |  | 1779 | 1731 | -48 | -2.700 |
| **300** | 1852 | 1780 | -72 | -3.888 |  | 1858 | 1813 | -45 | -2.422 |  | 1814 | 1764 | -50 | -2.771 |
| **400** | 1909 | 1832 | -77 | -4.034 |  | 1915 | 1867 | -48 | -2.507 |  | 1869 | 1815 | -54 | -2.879 |
| **500** | 1953 | 1872 | -81 | -4.147 |  | 1959 | 1909 | -50 | -2.552 |  | 1911 | 1855 | -57 | -2.958 |

**Table S 18: Asham quantile changes for LP3 distribution.**

| **Return Period** | **LOG PEARSON 3 (Asham)** | | | | | | | | | | | | | |
| --- | --- | --- | --- | --- | --- | --- | --- | --- | --- | --- | --- | --- | --- | --- |
| **MLE (BO)** | **MLE (AO)** | **Difference** | **Percentage** |  | **MOM (BO)** | **MOM (AO)** | **Difference** | **Percentage** |  | **LMOM (BO)** | **LMOM (AO)** | **Difference** | **Percentage** |
| **2** | 646 | 639 | -7 | -1.01 |  | 642 | 635 | -7 | -1.090 |  | 641 | 636 | -5 | -0.761 |
| **5** | 938 | 920 | -18 | -1.92 |  | 944 | 920 | -24 | -2.542 |  | 947 | 928 | -18 | -1.930 |
| **10** | 1111 | 1106 | -5 | -0.45 |  | 1126 | 1115 | -11 | -0.977 |  | 1131 | 1126 | -5 | -0.464 |
| **25** | 1308 | 1340 | 32 | 2.45 |  | 1333 | 1364 | 31 | 2.326 |  | 1344 | 1379 | 36 | 2.648 |
| **50** | 1440 | 1513 | 73 | 5.07 |  | 1473 | 1552 | 79 | 5.363 |  | 1488 | 1570 | 82 | 5.535 |
| **75** | 1511 | 1613 | 102 | 6.75 |  | 1549 | 1663 | 114 | 7.360 |  | 1566 | 1682 | 116 | 7.376 |
| **100** | 1560 | 1684 | 124 | 7.95 |  | 1600 | 1742 | 142 | 8.875 |  | 1620 | 1761 | 142 | 8.743 |
| **125** | 1597 | 1739 | 142 | 8.89 |  | 1639 | 1804 | 165 | 10.067 |  | 1660 | 1824 | 163 | 9.835 |
| **150** | 1626 | 1785 | 159 | 9.78 |  | 1670 | 1855 | 185 | 11.078 |  | 1693 | 1875 | 182 | 10.745 |
| **175** | 1650 | 1823 | 173 | 10.48 |  | 1696 | 1898 | 202 | 11.910 |  | 1720 | 1918 | 198 | 11.528 |
| **200** | 1671 | 1856 | 185 | 11.07 |  | 1718 | 1935 | 217 | 12.631 |  | 1743 | 1955 | 213 | 12.215 |
| **250** | 1704 | 1911 | 207 | 12.15 |  | 1754 | 1998 | 244 | 13.911 |  | 1780 | 2018 | 238 | 13.381 |
| **300** | 1731 | 1956 | 225 | 12.998 |  | 1783 | 2050 | 267 | 14.975 |  | 1810 | 2070 | 260 | 14.351 |
| **400** | 1773 | 2028 | 255 | 14.38 |  | 1828 | 2132 | 304 | 16.630 |  | 1857 | 2152 | 295 | 15.911 |
| **500** | 1804 | 2083 | 279 | 15.46 |  | 1861 | 2196 | 335 | 18.001 |  | 1892 | 2217 | 324 | 17.145 |
